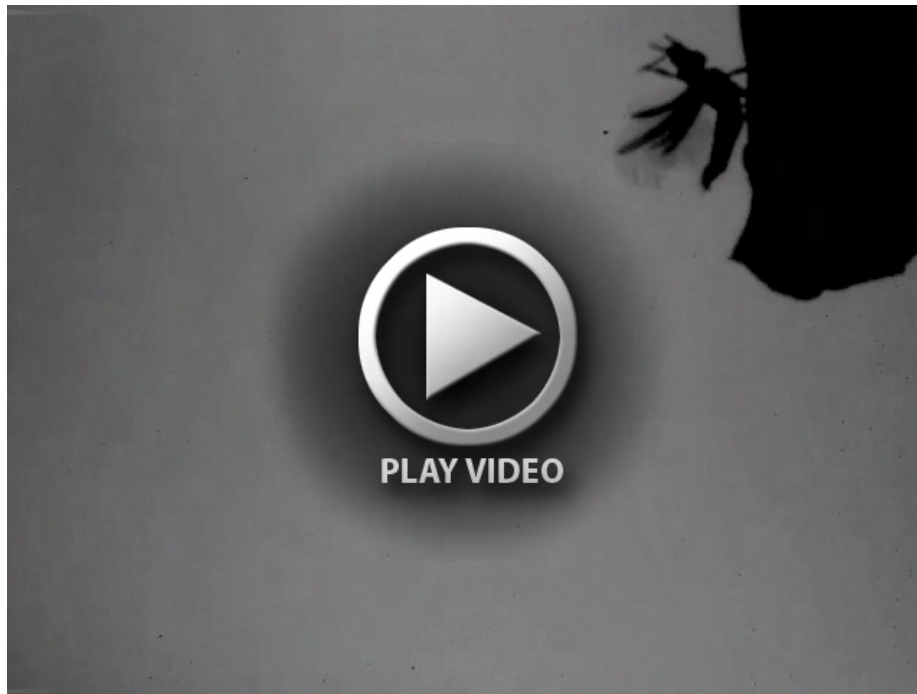

**Movie 1. Thrips during take off.** This video shows several wingbeats of a thrips during take off flight at 4000 fps.

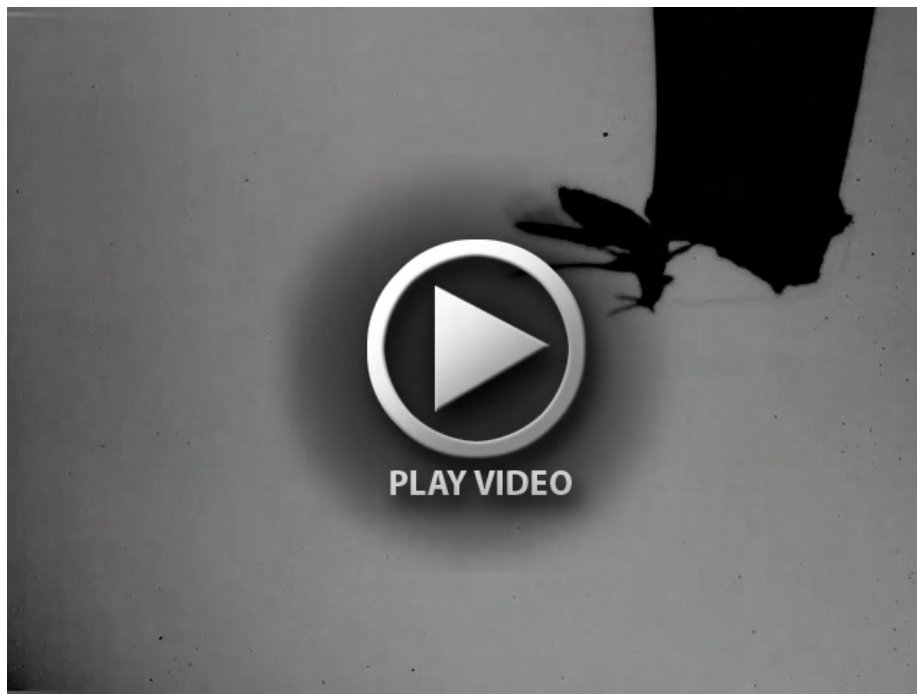

**Movie 2. Clap and fling motion of thrips during take off.** This video, filmed at 4000 fps, shows the clap and fling motion of the thrips wings during the first several wingbeats after take off.

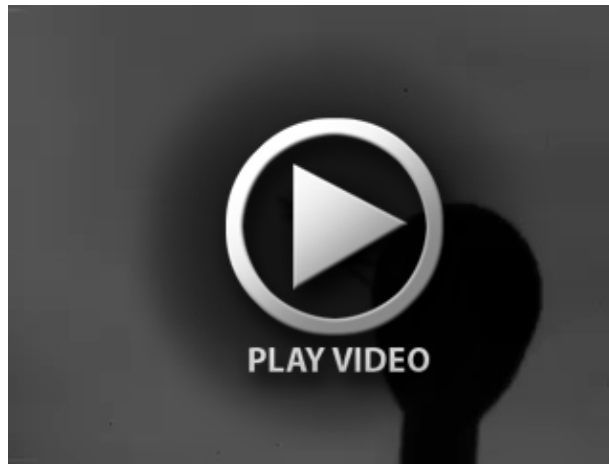

**Movie 3. Front view of thrips take off.** This video shows a front view of the thrips during the first several wing beats after take off. It was filmed at 4000 fps.

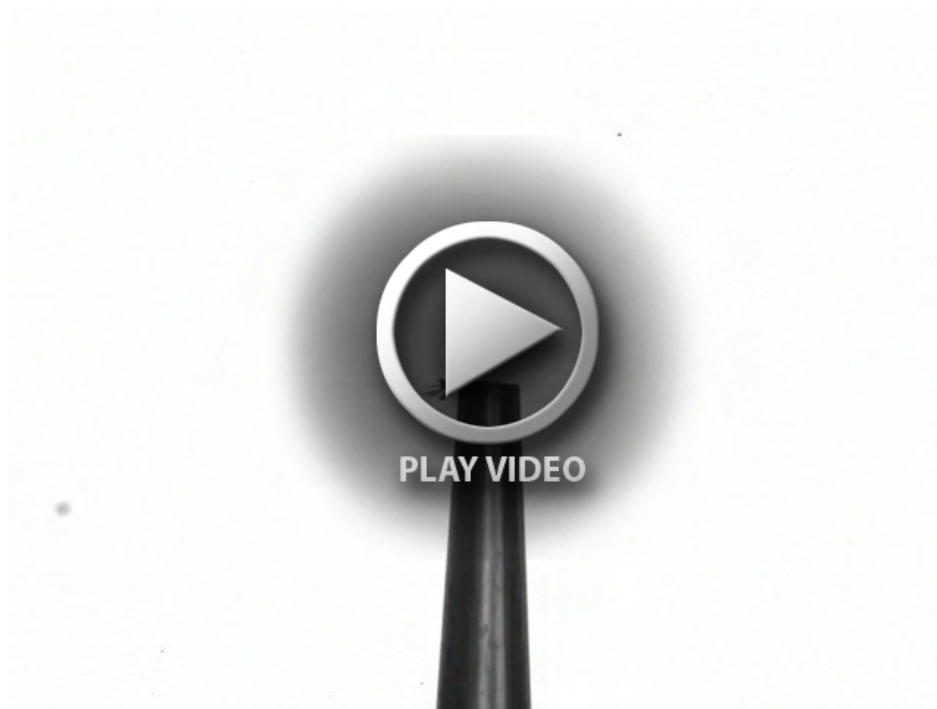

**Movie 4. Thrips parachuting.** In this video, the thrips beats its wings initially during take off but then spreads its wings and passively floats downward. This behaviour is reminiscent of a dandelion seed and is thought to be an intermittent parachuting behaviour.
